# Supplementary material
Source: MDPI journal article supplement (https://www.mdpi.com/2071-1050/13/15/8260)
Supplement: s1 [file s1]

**Table S1.** Ranks of tested polynomial fitting curves for power consumption during rice comminution as a function of batch dosing speed  $W$  and total increase in angular speeds  $S\Delta\omega$

| Model                                         | Residual Sum of Squares | Reduced Chi Sq | R <sup>2</sup> | Adj. R <sup>2</sup> | BIC              |
|-----------------------------------------------|-------------------------|----------------|----------------|---------------------|------------------|
| Poly ( $W$ )                                  | 0.85856                 | 0.06133        | 0.07353        | 0.00735             | -38.48362        |
| Poly ( $S\Delta\omega$ )                      | 0.25048                 | 0.01789        | 0.72971        | 0.71041             | -58.19396        |
| Poly ( $W, S\Delta\omega$ )                   | 0.18234                 | 0.01403        | 0.80324        | 0.77297             | -60.50125        |
| <b>Poly (<math>W, S\Delta\omega^2</math>)</b> | <b>0.09437</b>          | <b>0.00858</b> | <b>0.89817</b> | <b>0.86113</b>      | <b>-65.49439</b> |
| Poly ( $W, S\Delta\omega^3$ )                 | 0.09354                 | 0.01039        | 0.89906        | 0.83176             | -60.08981        |
| Poly ( $W^2$ )                                | 0.85852                 | 0.06604        | 0.07357        | -0.06896            | -35.7118         |
| Poly ( $S\Delta\omega^2$ )                    | 0.17214                 | 0.01324        | 0.81425        | 0.78567             | -61.42236        |
| Poly ( $W^2, S\Delta\omega$ )                 | 0.17267                 | 0.0157         | 0.81368        | 0.74592             | -55.82826        |
| Poly ( $W^2, S\Delta\omega^2$ )               | 0.09433                 | 0.00943        | 0.89821        | 0.84731             | -62.72884        |
| Poly ( $W^2, S\Delta\omega^3$ )               | 0.0825                  | 0.01179        | 0.91098        | 0.80923             | -56.55507        |
| Poly ( $W^3$ )                                | 0.85445                 | 0.0712         | 0.07796        | -0.15255            | -33.01521        |
| Poly ( $S\Delta\omega^3$ )                    | 0.17155                 | 0.0143         | 0.81488        | 0.7686              | -58.70422        |
| Poly ( $W^3, S\Delta\omega$ )                 | 0.15759                 | 0.01751        | 0.82994        | 0.71657             | -51.74451        |
| Poly ( $W^3, S\Delta\omega^2$ )               | 0.07902                 | 0.01129        | 0.91473        | 0.81729             | -57.24534        |
| Poly ( $W^3, S\Delta\omega^3$ )               | 0.07843                 | 0.01307        | 0.91537        | 0.78841             | -54.59161        |

The model with the best fitting selected based on the BIC and  $R^2 > 0.5$  was marked on red.

**Table S2.** Ranks of tested polynomial fitting curves for power consumption during corn comminution as a function of batch dosing speed  $W$  and total increase in angular speeds  $S\Delta\omega$

| Model                                    | Residual Sum of Squares | Reduced Chi Sq | R <sup>2</sup> | Adj. R <sup>2</sup> | BIC              |
|------------------------------------------|-------------------------|----------------|----------------|---------------------|------------------|
| Poly ( $W$ )                             | 1.48638                 | 0.10617        | 3.22492E-4     | -0.07108            | -29.70216        |
| <b>Poly (<math>S\Delta\omega</math>)</b> | <b>0.24184</b>          | <b>0.01727</b> | <b>0.83735</b> | <b>0.82573</b>      | <b>-58.75516</b> |
| Poly ( $W, S\Delta\omega$ )              | 0.24136                 | 0.01857        | 0.83767        | 0.8127              | -56.01432        |
| Poly ( $W, S\Delta\omega^2$ )            | 0.20408                 | 0.01855        | 0.86274        | 0.81283             | -53.15385        |
| Poly ( $W, S\Delta\omega^3$ )            | 0.16293                 | 0.0181         | 0.89042        | 0.81737             | -51.21178        |
| Poly ( $W^2$ )                           | 1.46895                 | 0.113          | 0.01204        | -0.13995            | -27.11827        |
| Poly ( $S\Delta\omega^2$ )               | 0.22416                 | 0.01724        | 0.84924        | 0.82605             | -57.19763        |
| Poly ( $W^2, S\Delta\omega$ )            | 0.20434                 | 0.01858        | 0.86257        | 0.8126              | -53.13358        |
| Poly ( $W^2, S\Delta\omega^2$ )          | 0.18665                 | 0.01867        | 0.87447        | 0.8117              | -51.80945        |
| Poly ( $W^2, S\Delta\omega^3$ )          | 0.1371                  | 0.01959        | 0.9078         | 0.80242             | -48.42875        |
| Poly ( $W^3$ )                           | 1.46542                 | 0.12212        | 0.01442        | -0.23197            | -24.38426        |
| Poly ( $S\Delta\omega^3$ )               | 0.19053                 | 0.01588        | 0.87186        | 0.83982             | -57.02555        |
| Poly ( $W^3, S\Delta\omega$ )            | 0.19239                 | 0.02138        | 0.8706         | 0.78434             | -48.55202        |
| Poly ( $W^3, S\Delta\omega^2$ )          | 0.16718                 | 0.02388        | 0.88756        | 0.75905             | -45.25406        |
| Poly ( $W^3, S\Delta\omega^3$ )          | 0.13356                 | 0.02226        | 0.91017        | 0.77544             | -46.07439        |

The model with the best fitting selected based on the BIC and  $R^2 > 0.5$  was marked on red.

**Table S3.** Ranks of tested polynomial fitting curves for throughput during rice comminution as a function of batch dosing speed  $W$  and total increase in angular speeds  $S\Delta\omega$

| Model                         | Residual Sum of Squares | Reduced Chi Sq | R <sup>2</sup> | Adj. R <sup>2</sup> | BIC      |
|-------------------------------|-------------------------|----------------|----------------|---------------------|----------|
| Poly ( $W$ )                  | 308.15213               | 22.01087       | 0.25458        | 0.20134             | 55.64584 |
| Poly ( $S\Delta\omega$ )      | 410.55464               | 29.32533       | 0.00687        | -0.06407            | 60.23649 |
| Poly ( $W, S\Delta\omega$ )   | 305.31304               | 23.48562       | 0.26145        | 0.14782             | 58.27034 |
| Poly ( $W, S\Delta\omega^2$ ) | 209.114                 | 19.01036       | 0.49415        | 0.31021             | 57.76019 |
| Poly ( $W, S\Delta\omega^3$ ) | 180.53228               | 20.05914       | 0.56329        | 0.27215             | 60.95384 |
| Poly ( $W^2$ )                | 243.55644               | 18.73511       | 0.41084        | 0.3202              | 54.65451 |

|                                                 |                 |                 |              |                |                 |
|-------------------------------------------------|-----------------|-----------------|--------------|----------------|-----------------|
| Poly ( $S\Delta\omega^2$ )                      | 356.82458       | 27.44804        | 0.13684      | 0.00405        | 60.76484        |
| Poly ( $W^2, S\Delta\omega$ )                   | 198.24838       | 18.02258        | 0.52044      | 0.34605        | 56.90644        |
| Poly ( $W^2, S\Delta\omega^2$ )                 | 144.51832       | 14.45183        | 0.65041      | 0.47561        | 54.6212         |
| <b>Poly (<math>W^2, S\Delta\omega^3</math>)</b> | <b>77.30327</b> | <b>11.04332</b> | <b>0.813</b> | <b>0.59929</b> | <b>52.92825</b> |
| Poly ( $W^3$ )                                  | 241.55623       | 20.12969        | 0.41568      | 0.26959        | 57.29516        |
| Poly ( $S\Delta\omega^3$ )                      | 337.77682       | 28.14807        | 0.18292      | -0.02135       | 62.65969        |
| Poly ( $W^3, S\Delta\omega$ )                   | 157.61483       | 17.51276        | 0.61873      | 0.36455        | 58.78176        |
| Poly ( $W^3, S\Delta\omega^2$ )                 | 94.35082        | 13.47869        | 0.77177      | 0.51093        | 56.11679        |
| Poly ( $W^3, S\Delta\omega^3$ )                 | 75.30305        | 12.55051        | 0.81784      | 0.5446         | 55.28139        |

The model with the best fitting selected based on the BIC and  $R^2 > 0.5$  was marked on red.

**Table S4.** Ranks of tested polynomial fitting curves for throughput during corn comminution as a function of batch dosing speed  $W$  and total increase in angular speeds  $S\Delta\omega$

| Model                                           | Residual Sum of Squares | Reduced Chi Sq  | $R^2$         | Adj. $R^2$     | BIC             |
|-------------------------------------------------|-------------------------|-----------------|---------------|----------------|-----------------|
| Poly ( $W$ )                                    | 601.07571               | 42.93398        | 0.23566       | 0.18106        | 66.33588        |
| Poly ( $S\Delta\omega$ )                        | 764.35603               | 54.59686        | 0.02803       | -0.0414        | 70.18089        |
| Poly ( $W, S\Delta\omega$ )                     | 579.03434               | 44.5411         | 0.26369       | 0.15041        | 68.51072        |
| Poly ( $W, S\Delta\omega^2$ )                   | 424.85456               | 38.62314        | 0.45975       | 0.26329        | 69.10206        |
| Poly ( $W, S\Delta\omega^3$ )                   | 416.94165               | 46.32685        | 0.46981       | 0.11635        | 74.34643        |
| Poly ( $W^2$ )                                  | 567.2993                | 43.63841        | 0.27861       | 0.16763        | 68.18313        |
| Poly ( $S\Delta\omega^2$ )                      | 619.19565               | 47.63043        | 0.21262       | 0.09148        | 69.58368        |
| Poly ( $W^2, S\Delta\omega$ )                   | 536.23852               | 48.74896        | 0.31811       | 0.07015        | 72.82738        |
| <b>Poly (<math>W^2, S\Delta\omega^2</math>)</b> | <b>391.07814</b>        | <b>39.10781</b> | <b>0.5027</b> | <b>0.25404</b> | <b>70.54922</b> |
| Poly ( $W^2, S\Delta\omega^3$ )                 | 382.15907               | 54.59415        | 0.51404       | -0.04135       | 78.49786        |
| Poly ( $W^3$ )                                  | 566.56068               | 47.21339        | 0.27955       | 0.09944        | 70.93487        |
| Poly ( $S\Delta\omega^3$ )                      | 611.5543                | 50.96286        | 0.22233       | 0.02792        | 72.15758        |
| Poly ( $W^3, S\Delta\omega$ )                   | 534.49374               | 59.38819        | 0.32033       | -0.13279       | 78.32041        |
| Poly ( $W^3, S\Delta\omega^2$ )                 | 389.0618                | 55.58026        | 0.50526       | -0.06016       | 78.78428        |
| Poly ( $W^3, S\Delta\omega^3$ )                 | 381.42045               | 63.57007        | 0.51498       | -0.21256       | 81.23949        |

The model with the best fitting selected based on the BIC and  $R^2 > 0.5$  was marked on red.

**Table S5.** Ranks of tested polynomial fitting curves for specific energy consumption during rice comminution as a function of batch dosing speed  $W$  and total increase in angular speeds  $S\Delta\omega$

| Model                                           | Residual Sum of Squares                   | Reduced Chi Sq                            | $R^2$          | Adj. $R^2$     | BIC               |
|-------------------------------------------------|-------------------------------------------|-------------------------------------------|----------------|----------------|-------------------|
| Poly ( $W$ )                                    | 0.00262                                   | $1.87183 \cdot 10^{-4}$                   | 0.04441        | -0.02384       | -131.15348        |
| Poly ( $S\Delta\omega$ )                        | 0.00223                                   | $1.59594 \cdot 10^{-4}$                   | 0.18526        | 0.12706        | -133.70478        |
| Poly ( $W, S\Delta\omega$ )                     | 0.00211                                   | $1.62502 \cdot 10^{-4}$                   | 0.22967        | 0.11116        | -131.82904        |
| Poly ( $W, S\Delta\omega^2$ )                   | 0.00104                                   | $9.48599 \cdot 10^{-5}$                   | 0.6195         | 0.48114        | -137.56932        |
| Poly ( $W, S\Delta\omega^3$ )                   | $8.65173 \cdot 10^{-4}$                   | $9.61304 \cdot 10^{-5}$                   | 0.68452        | 0.47419        | -135.022          |
| Poly ( $W^2$ )                                  | 0.00242                                   | $1.86081 \cdot 10^{-4}$                   | 0.11789        | -0.01781       | -129.66113        |
| Poly ( $S\Delta\omega^2$ )                      | 0.00138                                   | $1.06219 \cdot 10^{-4}$                   | 0.49647        | 0.41901        | -138.63194        |
| Poly ( $W^2, S\Delta\omega$ )                   | 0.0017                                    | $1.54128 \cdot 10^{-4}$                   | 0.38177        | 0.15696        | -129.8032         |
| <b>Poly (<math>W^2, S\Delta\omega^2</math>)</b> | <b><math>8.41944 \cdot 10^{-4}</math></b> | <b><math>8.41944 \cdot 10^{-5}</math></b> | <b>0.69299</b> | <b>0.53948</b> | <b>-138.23006</b> |
| Poly ( $W^2, S\Delta\omega^3$ )                 | $6.42658 \cdot 10^{-4}$                   | $9.18083 \cdot 10^{-5}$                   | 0.76566        | 0.49783        | -134.23389        |
| Poly ( $W^3$ )                                  | 0.0023                                    | $1.91346 \cdot 10^{-4}$                   | 0.16271        | -0.04661       | -127.72283        |
| Poly ( $S\Delta\omega^3$ )                      | 0.00138                                   | $1.14651 \cdot 10^{-4}$                   | 0.49831        | 0.37289        | -135.9179         |
| Poly ( $W^3, S\Delta\omega$ )                   | 0.00155                                   | $1.72389 \cdot 10^{-4}$                   | 0.43425        | 0.05708        | -125.6772         |
| Poly ( $W^3, S\Delta\omega^2$ )                 | $5.24798 \cdot 10^{-4}$                   | $7.49711 \cdot 10^{-5}$                   | 0.80863        | 0.58993        | -137.47549        |
| Poly ( $W^3, S\Delta\omega^3$ )                 | $5.19755 \cdot 10^{-4}$                   | $8.66258 \cdot 10^{-5}$                   | 0.81047        | 0.52618        | -134.85741        |

The model with the best fitting selected based on the BIC and  $R^2 > 0.5$  was marked on red.

**Table S6.** Ranks of tested polynomial fitting curves for specific energy consumption during corn comminution as a function of batch dosing speed  $W$  and total increase in angular speeds  $S\Delta\omega$

| Model                           | Residual Sum of Squares | Reduced Chi Sq           | R <sup>2</sup> | Adj. R <sup>2</sup> | BIC        |
|---------------------------------|-------------------------|--------------------------|----------------|---------------------|------------|
| Poly ( $W$ )                    | 0.00794                 | 5.67185·10 <sup>-4</sup> | 0.07075        | 0.00438             | -113.41592 |
| Poly ( $S\Delta\omega$ )        | 0.00611                 | 4.36576·10 <sup>-4</sup> | 0.28474        | 0.23365             | -117.60349 |
| Poly ( $W, S\Delta\omega$ )     | 0.00551                 | 4.23651·10 <sup>-4</sup> | 0.35549        | 0.25634             | -116.49748 |
| Poly ( $W, S\Delta\omega^2$ )   | 0.00457                 | 4.15238·10 <sup>-4</sup> | 0.46548        | 0.2711              | -113.9461  |
| Poly ( $W, S\Delta\omega^3$ )   | 0.00414                 | 4.59621·10 <sup>-4</sup> | 0.51592        | 0.19319             | -109.98685 |
| Poly ( $W^2$ )                  | 0.00793                 | 6.0987·10 <sup>-4</sup>  | 0.07219        | -0.07055            | -110.66812 |
| Poly ( $S\Delta\omega^2$ )      | 0.00524                 | 4.0319·10 <sup>-4</sup>  | 0.38662        | 0.29225             | -117.28953 |
| Poly ( $W^2, S\Delta\omega$ )   | 0.00543                 | 4.93266·10 <sup>-4</sup> | 0.36503        | 0.13413             | -111.19094 |
| Poly ( $W^2, S\Delta\omega^2$ ) | 0.00456                 | 4.55533·10 <sup>-4</sup> | 0.46691        | 0.20037             | -111.21663 |
| Poly ( $W^2, S\Delta\omega^3$ ) | 0.00403                 | 5.76225·10 <sup>-4</sup> | 0.52797        | -0.01149            | -104.84517 |
| Poly ( $W^3$ )                  | 0.00793                 | 6.60692·10 <sup>-4</sup> | 0.07219        | -0.15976            | -107.89553 |
| Poly ( $S\Delta\omega^3$ )      | 0.00494                 | 4.11301·10 <sup>-4</sup> | 0.42241        | 0.27801             | -115.47893 |
| Poly ( $W^3, S\Delta\omega$ )   | 0.00534                 | 5.92801·10 <sup>-4</sup> | 0.37565        | -0.04059            | -105.91555 |
| Poly ( $W^3, S\Delta\omega^2$ ) | 0.00434                 | 6.19918·10 <sup>-4</sup> | 0.49218        | -0.08819            | -103.67574 |
| Poly ( $W^3, S\Delta\omega^3$ ) | 0.00403                 | 6.72262·10 <sup>-4</sup> | 0.52797        | -0.18007            | -102.07258 |

The model with the best fitting selected based on the BIC and R<sup>2</sup>>0.5 was marked on red.

**Table S7.** Ranks of tested polynomial fitting curves for size reduction ratio during rice comminution as a function of batch dosing speed  $W$  and total increase in angular speeds  $S\Delta\omega$

| Model                           | Residual Sum of Squares  | Reduced Chi Sq           | R <sup>2</sup> | Adj. R <sup>2</sup> | BIC        |
|---------------------------------|--------------------------|--------------------------|----------------|---------------------|------------|
| Poly ( $W$ )                    | 0.01434                  | 0.00102                  | 0.01169        | -0.05891            | -103.9609  |
| Poly ( $S\Delta\omega$ )        | 0.00183                  | 1.30382·10 <sup>-4</sup> | 0.87418        | 0.86519             | -136.93943 |
| Poly ( $W, S\Delta\omega$ )     | 0.00166                  | 1.2737·10 <sup>-4</sup>  | 0.88587        | 0.86831             | -135.7265  |
| Poly ( $W, S\Delta\omega^2$ )   | 0.00164                  | 1.49209·10 <sup>-4</sup> | 0.88687        | 0.84573             | -130.32213 |
| Poly ( $W, S\Delta\omega^3$ )   | 0.00102                  | 1.13081·10 <sup>-4</sup> | 0.92985        | 0.88308             | -132.42366 |
| Poly ( $W^2$ )                  | 0.01432                  | 0.0011                   | 0.01306        | -0.13877            | -101.21062 |
| Poly ( $S\Delta\omega^2$ )      | 0.00182                  | 1.40082·10 <sup>-4</sup> | 0.87448        | 0.85516             | -134.20438 |
| Poly ( $W^2, S\Delta\omega$ )   | 0.00163                  | 1.47782·10 <sup>-4</sup> | 0.88795        | 0.8472              | -130.47588 |
| Poly ( $W^2, S\Delta\omega^2$ ) | 0.00162                  | 1.62133·10 <sup>-4</sup> | 0.88824        | 0.83237             | -127.74545 |
| Poly ( $W^2, S\Delta\omega^3$ ) | 9.7441·10 <sup>-4</sup>  | 1.39201·10 <sup>-4</sup> | 0.93284        | 0.85608             | -127.57439 |
| Poly ( $W^3$ )                  | 0.0143                   | 0.00119                  | 0.01404        | -0.23245            | -98.45392  |
| Poly ( $S\Delta\omega^3$ )      | 0.0012                   | 9.97952·10 <sup>-5</sup> | 0.91745        | 0.89682             | -138.13822 |
| Poly ( $W^3, S\Delta\omega$ )   | 0.00159                  | 1.7645·10 <sup>-4</sup>  | 0.89054        | 0.81756             | -125.3047  |
| Poly ( $W^3, S\Delta\omega^2$ ) | 0.00158                  | 2.26246·10 <sup>-4</sup> | 0.89084        | 0.76608             | -119.8032  |
| Poly ( $W^3, S\Delta\omega^3$ ) | 9.60194·10 <sup>-4</sup> | 1.60032·10 <sup>-4</sup> | 0.93382        | 0.83454             | -125.03695 |

The model with the best fitting selected based on the BIC and R<sup>2</sup>>0.5 was marked on red.

**Table S8.** Ranks of tested polynomial fitting curves for size reduction ratio during corn comminution as a function of batch dosing speed  $W$  and total increase in angular speeds  $S\Delta\omega$

| Model                         | Residual Sum of Squares | Reduced Chi Sq | R <sup>2</sup> | Adj. R <sup>2</sup> | BIC       |
|-------------------------------|-------------------------|----------------|----------------|---------------------|-----------|
| Poly ( $W$ )                  | 21.28902                | 1.52064        | 0.00888        | -0.06191            | 12.88741  |
| Poly ( $S\Delta\omega$ )      | 4.40668                 | 0.31476        | 0.79485        | 0.78019             | -12.31371 |
| Poly ( $W, S\Delta\omega$ )   | 4.21585                 | 0.3243         | 0.80373        | 0.77353             | -10.24944 |
| Poly ( $W, S\Delta\omega^2$ ) | 4.08608                 | 0.37146        | 0.80977        | 0.7406              | -5.2045   |
| Poly ( $W, S\Delta\omega^3$ ) | 3.39615                 | 0.37735        | 0.84189        | 0.73649             | -2.61843  |
| Poly ( $W^2$ )                | 20.65312                | 1.5887         | 0.03849        | -0.10944            | 15.1748   |
| Poly ( $S\Delta\omega^2$ )    | 4.39685                 | 0.33822        | 0.7953         | 0.76381             | -9.57686  |

|                                 |         |         |         |          |          |
|---------------------------------|---------|---------|---------|----------|----------|
| Poly ( $W^2, S\Delta\omega$ )   | 3.46002 | 0.31455 | 0.83892 | 0.78034  | -7.86552 |
| Poly ( $W^2, S\Delta\omega^2$ ) | 3.45018 | 0.34502 | 0.83938 | 0.75906  | -5.13846 |
| Poly ( $W^2, S\Delta\omega^3$ ) | 2.63743 | 0.37678 | 0.87721 | 0.73689  | -1.11863 |
| Poly ( $W^3$ )                  | 20.1386 | 1.67822 | 0.06244 | -0.17195 | 17.54374 |
| Poly ( $S\Delta\omega^3$ )      | 3.81087 | 0.31757 | 0.82258 | 0.77823  | -9.09275 |
| Poly ( $W^3, S\Delta\omega$ )   | 2.82268 | 0.31363 | 0.86859 | 0.78098  | -5.57773 |
| Poly ( $W^3, S\Delta\omega^2$ ) | 2.70889 | 0.38698 | 0.87389 | 0.72976  | -0.69091 |
| Poly ( $W^3, S\Delta\omega^3$ ) | 2.12291 | 0.35382 | 0.90117 | 0.75292  | -1.81831 |

---

The model with the best fitting selected based on the BIC and  $R^2 > 0.5$  was marked on red.
